# Supplementary material for: Canagliflozin extends life span in genetically heterogeneous male but not female mice
Source: PubMed Central journal article supplement (PMC7710304; doi:10.1172/jci.insight.140019), 2020-11-05
Supplement: jciinsight-5-140019-s157.pdf [file jciinsight-5-140019-s157.pdf]

**Supplemental Table 1: Incidental Pathology Findings – Lesion Counts**

| <b>Lesion</b>                                   | <b>Cana Cases</b> | <b>Control Cases</b> | <b>p-value</b> |
|-------------------------------------------------|-------------------|----------------------|----------------|
| Adrenal subcapsular cell hyperplasia            | 35                | 37                   | 0.85           |
| Adrenal neoplasia                               | 9                 | 3                    | 0.12           |
| Atrial thrombus                                 | 11                | 5                    | 0.12           |
| Eosinophilic crystalline pneumonia              | 5                 | 7                    | 0.76           |
| Hemangiosarcoma                                 | 6                 | 6                    | 0.99           |
| Heart neoplasia (non-HPN)                       | 2                 | 5                    | 0.27           |
| Hematopoietic malignancy (HPN)                  | 22                | 20                   | 0.85           |
| Hepatocellular hypertrophy/hyperplasia          | 21                | 15                   | 0.32           |
| Hyaline droplets (kidney tubules)               | 10                | 7                    | 0.60           |
| Hepatocellular adenoma                          | 2                 | 5                    | 0.27           |
| Mammary adenocarcinoma or adenoma               | 6                 | 6                    | 0.99           |
| Thalamic mineralization                         | 12                | 14                   | 0.82           |
| Pancreatic inflammation                         | 5                 | 2                    | 0.27           |
| Pulmonary adenoma                               | 17                | 10                   | 0.19           |
| Pulmonary carcinoma                             | 9                 | 15                   | 0.18           |
| Pulmonary neoplasia (other)                     | 5                 | 5                    | 0.99           |
| Extra-medullary hematopoiesis (spleen)          | 19                | 12                   | 0.27           |
| Splenic neoplasia                               | 12                | 19                   | 0.21           |
| Thyroid follicular dilation or cystic follicles | 41                | 36                   | 0.34           |
| Thyroid follicular hyperplasia                  | 8                 | 6                    | 0.59           |

The tabulated values are the number of cases in which the lesion was observed, in a collection of 58 Cana and 58 Control mice (four mice were not evaluable, due to advanced autolysis.) The p-value reflects the two-tailed Fisher Exact Test. These counts are underestimates, since autolysis will have rendered many lesions undetectable, but the extent of autolysis was not significantly different ( $p = 0.7$ ) for Cana and Control mice.

**Supplemental Table 2: Incidental Pathology Findings: Graded Lesions**

| <b>Lesion</b>                          | <b>Cana</b> | <b>Control</b> | <b>p-value</b> |
|----------------------------------------|-------------|----------------|----------------|
| Adrenal degeneration (*)               | 1.76        | 1.90           | 0.55           |
| Cardiomyopathy                         | 1.46        | 1.65           | 0.26           |
| Glomerulonephropathy                   | 1.55        | 1.85           | 0.12           |
| Liver degeneration/necrosis            | 1.06        | 0.64           | 0.10           |
| Liver telangiectasia/angiectasis       | 0.41        | 0.09           | 0.01           |
| Macrovesicular hepatic lipidosis       | 0.36        | 0.46           | 0.58           |
| Microvesicular hepatic lipidosis       | 0.81        | 0.89           | 0.70           |
| Ovarian degeneration (*)               | 3.67        | 3.42           | 0.26           |
| Pancreatic islet hyperplasia           | 0.76        | 1.06           | 0.13           |
| Pancreatic exocrine atrophy            | 1.09        | 0.76           | 0.39           |
| Salivary gland lymphoid aggregates     | 1.29        | 1.30           | 0.99           |
| Testicular degeneration (*)            | 1.48        | 1.83           | 0.20           |
| Uterine cystic endometrial hyperplasia | 2.33        | 2.10           | 0.41           |

Lesions were graded on scales (0 – 2 or 0 – 4, depending on lesion). Values shown are mean levels in Cana and Control mice, shown with the p-value from a two-sided Student's t-test (equal variance assumption). The number of scorable cases varied among lesions, because autolysis renders some lesions unscorable while allowing others to be assigned a grade.

\*Scoring for adrenal gland, ovary, and testes includes assessment of a number of age-related lesions in these organs, including adrenal pigment and cortical changes; ovarian atrophy, interstitial cell hyperplasia, and pigment; and testicular atrophy and mineralization.
